# Supplementary material for: Highly efficient and stable deep-blue emitting anthracene-derived molecular glass for versatile types of non-doped OLED applications
Source: Royal Society of Chemistry journal article supplement (doi:10.1039/c1jm14482k), 2011-10-20
Supplement: c1jm14482k.pdf [file c1jm14482k.pdf]

Supplementary Material (ESI) for Chemical Communication  
This journal is (c) The Royal Society of Chemistry 2011

## Electronic Supplementary Information

### Highly Efficient and Stable Deep-Blue Emitting Anthracene-Derived Molecular Glass for Versatile Types of Non-Doped OLED Applications

By *Illhun Cho, Se Hun Kim, Jong H. Kim, Sanghyuk Park, and Soo Young Park\**

*Creative Research Initiative Center for Supramolecular Optoelectronic Materials and WCU Hybrid*

*Materials Program, Department of Materials Science and Engineering, Seoul National University, 1*

*Gwanak-ro, Gwanak-gu, Seoul 151-744, Korea. Fax: (+82) 2-886-8331; Tel: (+82) 2-880-8327; E-mail:*

[parksy@snu.ac.kr](mailto:parksy@snu.ac.kr)

#### Content:

|                                         |    |
|-----------------------------------------|----|
| 1. DSC and TAG thermograms of PCAN..... | S2 |
|-----------------------------------------|----|

Supplementary Material (ESI) for Chemical Communication  
This journal is (c) The Royal Society of Chemistry 2011

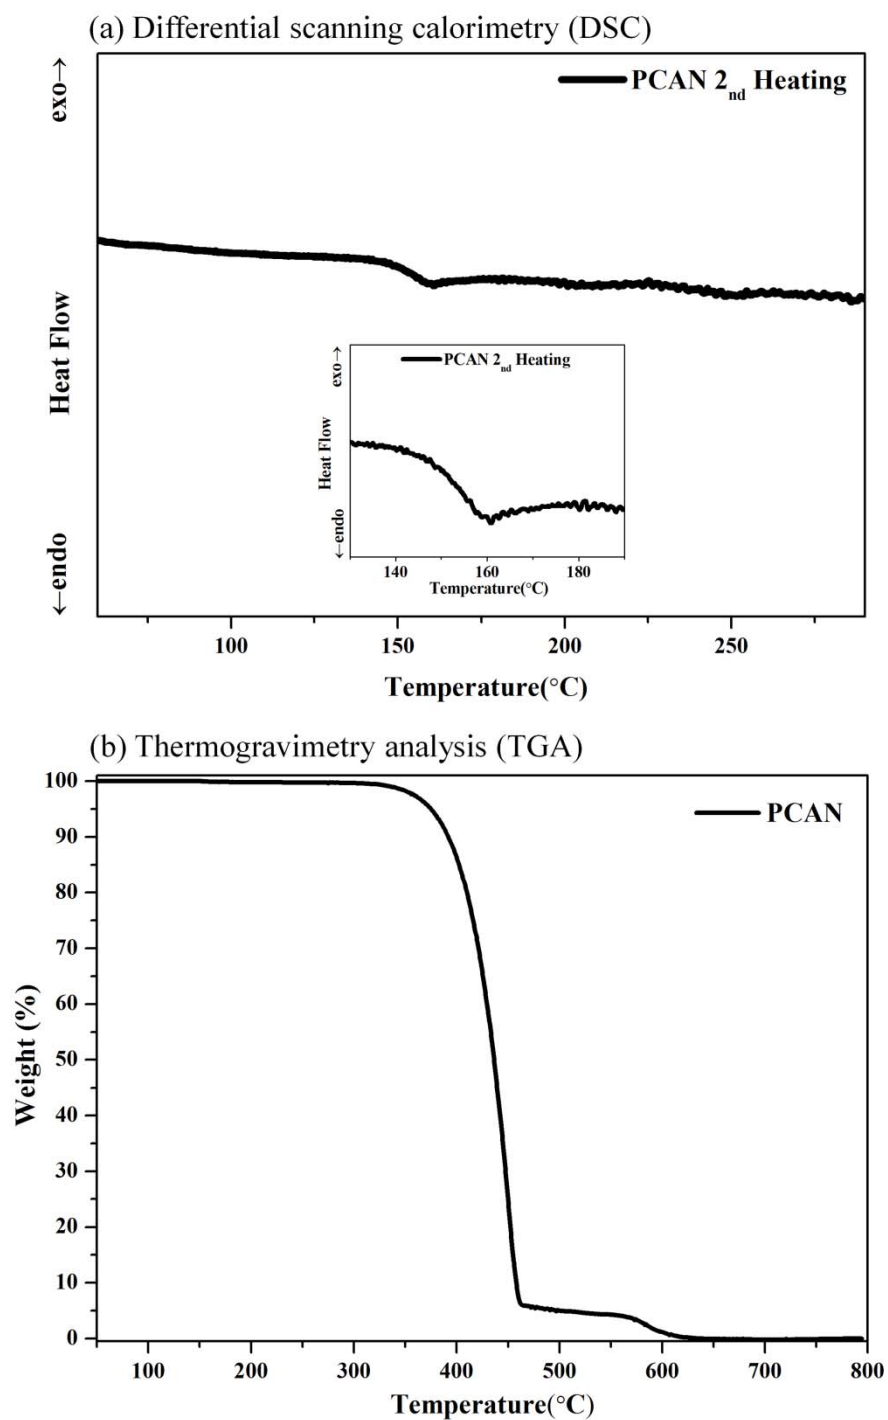

**Fig. S1** Thermal properties of PCAN ((a) Differential scanning calorimetry (DSC) thermogram, and (b) Thermogravimetry analysis (TGA) thermogram).
